# Supplementary figures and images for: A unique pathway of PtNi nanoparticle formation observed with liquid cell transmission electron microscopy
Source: Royal Society of Chemistry journal article supplement (doi:10.1039/c9nr08352a), 2019-12-20

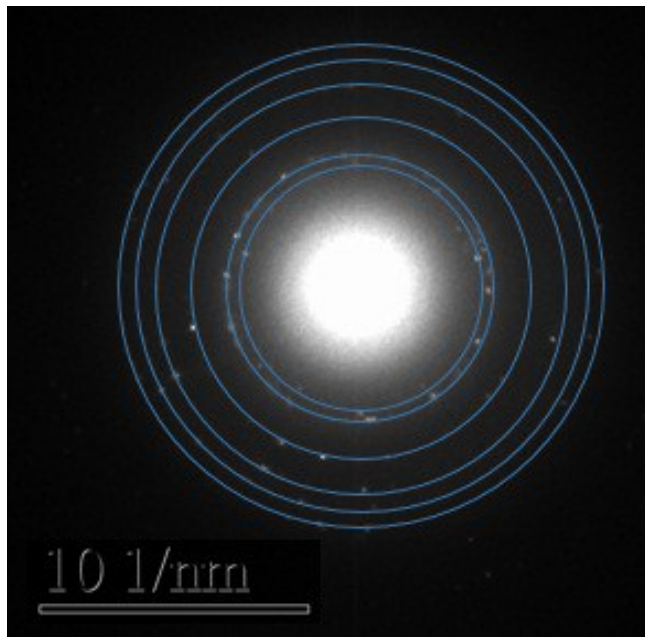

Supplement: c9nr08352a1.pdf [file c9nr08352a1.pdf]

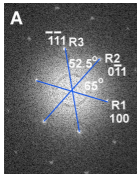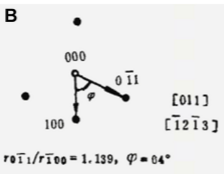

Supplement: c9nr08352a2.pdf [file c9nr08352a2.pdf]

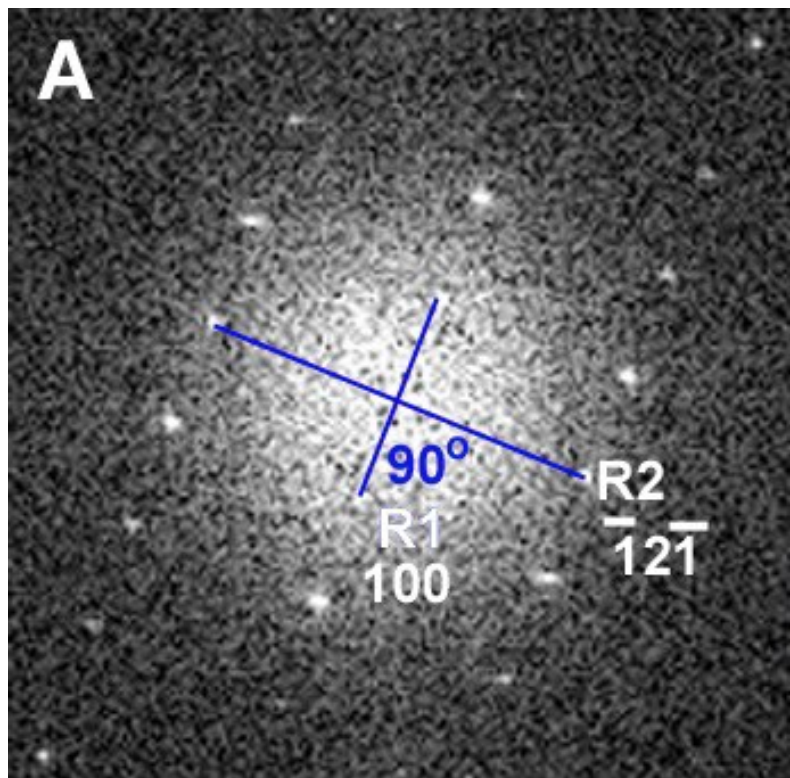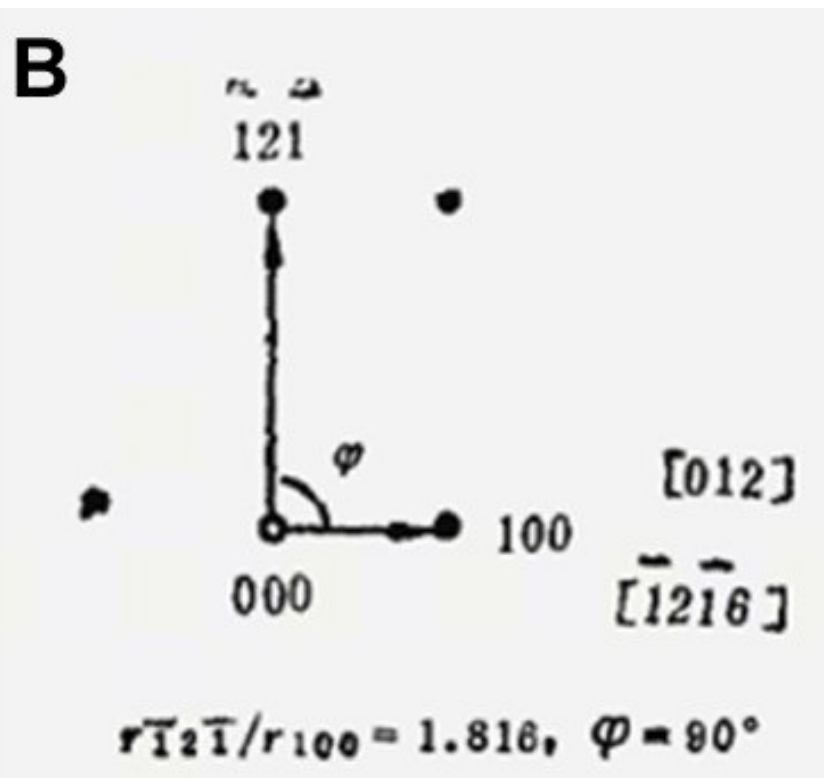

Supplement: c9nr08352a3.pdf [file c9nr08352a3.pdf]
